# Supplementary material for: MAD (about median) vs. quantile-based alternatives for classical standard deviation, skewness, and kurtosis
Source: Frontiers journal article supplement (doi:10.3389/fams.2023.1206537), 2023-06-02
Supplement: Data_Sheet_1.pdf [file Data_Sheet_1.pdf]

## Appendix 1: Summary Table

Table 1 presents a summary of results for various distributions. As before, let  $Q_1$  and  $Q_3$  denote the first and third quartiles and let  $O_i$  denote the corresponding octiles of the standard normal distribution. We note that for the distributions considered,  $T_M < T_Q < K$ .

## Appendix 2: Details for Log-normal Distribution

We provide some derivations on comparing the performance measures for the log-normal distribution. Recall that classical measures for log-normal (see table 1) are:

$$\begin{aligned}\mu' &= e^{\mu+\sigma^2/2}, & M' &= e^\mu, & (\sigma')^2 &= (e^{\sigma^2} - 1)e^{2\mu+\sigma^2}, \\ S' &= (e^{\sigma^2} + 2)\sqrt{e^{\sigma^2} - 1}, & K' &= e^{4\sigma^2} + 2e^{3\sigma^2} + 3e^{2\sigma^2} - 6\end{aligned}$$

To compute MAD-based measures, we consider the following integral:

$$I(z) = \int_0^z t f(t) dt = \frac{1}{\sigma\sqrt{2\pi}} \int_0^z e^{-(\log t - \mu)^2/2\sigma^2} dt, \quad z > 0$$

To evaluate this integral, we consider the following change of variables:  $u = (\log t - \mu)/\sigma$  giving us  $dt = \sigma e^{\mu+\sigma u} du$ . If we define  $z^* = (\log z - \mu)/\sigma$ , then we can re-write the integral in equation ( ) as follows:

$$\begin{aligned}I(z) &= \frac{1}{\sigma\sqrt{2\pi}} \int_{-\infty}^{z^*} e^{-u^2/2} \sigma e^{\mu+\sigma u} du = \frac{1}{\sqrt{2\pi}} \int_{-\infty}^{z^*} e^{-(u^2-2\sigma u+\sigma^2)/2} e^{\mu+\sigma^2/2} du \\ &= \mu' \int_{-\infty}^{z^*} \left[ \frac{1}{\sqrt{2\pi}} e^{-(u-\sigma)^2/2} \right] du\end{aligned}$$

The term in the bracket is the density function of a normal random variable with mean  $\sigma$  and unit variance. With the simple change of variable  $v = u - \sigma$ , we can re-write the above integral as

$$I(z) = \mu' \int_{-\infty}^{z^*-\sigma} \frac{1}{\sqrt{2\pi}} e^{-v^2/2} dv = \mu' \Phi(z^* - \sigma) = \mu' \Phi\left(\frac{\log z - \mu}{\sigma} - \sigma\right)$$

Next, let us compare MAD-based and quantile-based measures. The MAD-based measures for log-normal distribution (Table 1) are

$$\begin{aligned}H' &= \mu'(2\Phi(\sigma) - 1), & A'_M &= \frac{e^{\sigma^2/2} - 1}{e^{\sigma^2/2}(2\Phi(\sigma) - 1)}, \\ T'_M &= \frac{-1 - 2\Phi(\sigma) + 2\Phi(\sigma - Q_1) + 2\Phi(\sigma - Q_3)}{2\Phi(\sigma) - 1}\end{aligned} \tag{1}$$

Table 1: Summary Comparison of Distributions

| Measure                                                                                                                                                                                       | Classical                                                            | MAD-based                                                         | Quantile-based                                                                    |
|-----------------------------------------------------------------------------------------------------------------------------------------------------------------------------------------------|----------------------------------------------------------------------|-------------------------------------------------------------------|-----------------------------------------------------------------------------------|
| <b>Uniform Distribution (symmetric)</b>                                                                                                                                                       |                                                                      |                                                                   |                                                                                   |
| Deviation<br>$H < \sigma < H_Q$                                                                                                                                                               | $\sigma = \frac{(b-a)}{2\sqrt{3}}$                                   | $H = \frac{(b-a)}{4}$                                             | $H_Q = \frac{(b-a)}{2}$                                                           |
| Skewness                                                                                                                                                                                      | $S = 0$                                                              | $A_M = 0$                                                         | $A_Q = 0$                                                                         |
| Kurtosis<br>$T_M < T_Q < K$                                                                                                                                                                   | $K = 1.8$                                                            | $T_M = 0.5$                                                       | $T_Q = 1$                                                                         |
| <b>Normal Distribution <math>N(\mu, \sigma^2)</math> (symmetric)</b>                                                                                                                          |                                                                      |                                                                   |                                                                                   |
| Deviation<br>$H_Q < H < \sigma$                                                                                                                                                               | $\sigma$                                                             | $H = \sqrt{\frac{2}{\pi}} \sigma \approx 0.80 \sigma$             | $H_Q = Q_3 \sigma \approx 0.68 \sigma$                                            |
| Skewness                                                                                                                                                                                      | $S = 0$                                                              | $A_M = 0$                                                         | $A_Q = 0$                                                                         |
| Kurtosis<br>$T_M < T_Q < K$                                                                                                                                                                   | $K = 3$                                                              | $T_M = -1 + 2e^{-Q_3^2/2} \approx 0.59$                           | $T_Q = \frac{O_7 - O_5}{Q_3} \approx 1.23$                                        |
| <b>Log-Normal Distribution <math>(\mu, \sigma^2)</math> (asymmetric)</b>                                                                                                                      |                                                                      |                                                                   |                                                                                   |
| Deviation<br>$H'_Q < H' < \sigma'$                                                                                                                                                            | $\sqrt{(e^{\sigma^2} - 1)e^{2\mu + \sigma^2}}$                       | $e^{\mu + \sigma^2/2} (2\Phi(\sigma) - 1)$                        | $e^\mu \frac{(e^{\sigma Q_3} - e^{-\sigma Q_3})}{2}$                              |
| Skewness<br>$0 < A'_M, A'_Q < S'$                                                                                                                                                             | $(e^{\sigma^2} + 2)\sqrt{e^{\sigma^2} - 1}$<br>(unbounded)           | $\frac{(e^{\sigma^2/2} - 1)}{e^{\sigma^2/2} (2\Phi(\sigma) - 1)}$ | $-1 + \frac{2e^{\sigma Q_3}}{(e^{\sigma Q_3} + 1)}$                               |
| Kurtosis<br>$T'_M < T'_Q < K'$                                                                                                                                                                | $e^{4\sigma^2} + 2e^{3\sigma^2} + 3e^{2\sigma^2} - 6$<br>(unbounded) | $\frac{N_M(\sigma, Q_1, Q_3)}{2\Phi(\sigma) - 1}$                 | $\frac{N_Q(\sigma, O_5, O_7)}{(e^{\sigma Q_3} - e^{-\sigma Q_3})}$<br>(unbounded) |
| $N_M(\sigma, Q_1, Q_3) = -1 - 2\Phi(\sigma) + 2\Phi(\sigma - Q_1) + 2\Phi(\sigma - Q_3)$<br>$N_Q(\sigma, O_5, O_7) = (e^{-\sigma O_5} - e^{-\sigma O_7}) + (e^{\sigma O_7} - e^{\sigma O_5})$ |                                                                      |                                                                   |                                                                                   |

**Table 1.** Summary Comparison of Distributions (continued)

| Measure                                                                                             | Classical                                                                                 | MAD-based                                                               | Quantile-based                                                            |
|-----------------------------------------------------------------------------------------------------|-------------------------------------------------------------------------------------------|-------------------------------------------------------------------------|---------------------------------------------------------------------------|
| <b>Exponential Distribution with rate <math>\lambda</math> (asymmetric)</b>                         |                                                                                           |                                                                         |                                                                           |
| Deviation<br>$H < H_Q < \sigma$                                                                     | $\sigma = \frac{1}{\lambda}$                                                              | $H = \frac{\log 2}{\lambda} \approx 0.69\sigma$                         | $H_Q = \frac{\log 3}{2\lambda} \approx 0.55\sigma$                        |
| Skewness<br>$A_Q < A_M < S$                                                                         | $S = 2$                                                                                   | $A_M = -1 + \frac{1}{\log 2} \approx 0.44$                              | $A_Q = -1 + \frac{2 \log 2}{\log 3} \approx 0.26$                         |
| Kurtosis<br>$T_M < T_Q < K$                                                                         | $K = 9$                                                                                   | $T_M = 3 - \frac{3 \log 3}{2 \log 2} \approx 0.62$                      | $T_Q = 1 + \frac{\log(7/5)}{\log 3} \approx 1.31$                         |
| <b>Laplace Distribution with location <math>\mu</math> and scale <math>b</math> (symmetric)</b>     |                                                                                           |                                                                         |                                                                           |
| Deviation<br>$H_Q < H < \sigma$                                                                     | $\sigma = b\sqrt{2} \approx 1.41b$                                                        | $H = b$                                                                 | $H_Q = b \log 2 \approx 0.69b$                                            |
| Skewness                                                                                            | $S = 0$                                                                                   | $A_M = 0$                                                               | $A_Q = 0$                                                                 |
| Kurtosis<br>$T_M < T_Q < K$                                                                         | $K = 6$                                                                                   | $T_M = \log 2 \approx 0.69$                                             | $T_Q = \frac{\log 3}{\log 2} \approx 1.58$                                |
| <b>Pareto Distribution with shape <math>\alpha</math> and scale <math>\beta</math> (asymmetric)</b> |                                                                                           |                                                                         |                                                                           |
| Deviation<br>$H_Q < H < \sigma$                                                                     | $\sigma = \frac{\beta}{(\alpha-1)} \sqrt{\frac{\alpha}{\alpha-2}}$<br>$(\alpha > 2)$      | $H = \frac{\beta \alpha (\sqrt[3]{2}-1)}{(\alpha-1)}$<br>$(\alpha > 1)$ | $H_Q = \frac{\beta (\sqrt[3]{4}-\sqrt[3]{4/3})}{2}$                       |
| Skewness<br>$A_Q < A_M < S$                                                                         | $S = \frac{2(1+\alpha)}{(\alpha-3)} \sqrt{\frac{\alpha-2}{\alpha}}$<br>$(\alpha > 3)$     | $A_M = -1 + \frac{\sqrt[3]{2}}{\alpha(\sqrt[3]{2}-1)}$                  | $A_Q = -1 + \frac{2(\sqrt[3]{4}-\sqrt[3]{2})}{\sqrt[3]{4}-\sqrt[3]{4/3}}$ |
| Kurtosis<br>$T_M < T_Q < K$                                                                         | $K = \frac{6(\alpha^3+\alpha^2-6\alpha-2)}{\alpha(\alpha-3)(\alpha-4)}$<br>$(\alpha > 4)$ | $T_M = \frac{N_M(\alpha)}{2(\sqrt[3]{2}-1)}$                            | $T_Q = \frac{N_Q(\alpha)}{\sqrt[3]{4}-\sqrt[3]{4/3}}$                     |

$$N_M(\alpha) = 3\sqrt[3]{4/3} + \sqrt[3]{4} - 2\sqrt[3]{2} - 2$$

$$N_Q(\alpha) = (\sqrt[3]{8/5} - \sqrt[3]{8/7}) + (\sqrt[3]{8} - \sqrt[3]{8/3})$$

whereas the quantile-based measures (table 1) are:

$$\begin{aligned} H'_Q &= e^\mu \frac{(e^{\sigma Q_3} - e^{-\sigma Q_3})}{2}, & A'_Q &= -1 + \frac{2e^{\sigma Q_3}}{e^{\sigma Q_3} + 1}, \\ T'_Q &= \frac{(e^{-\sigma O_5} - e^{-\sigma O_7}) + (e^{\sigma O_7} - e^{\sigma O_5})}{e^{\sigma Q_3} - e^{-\sigma Q_3}} \end{aligned} \quad (2)$$

To compare MAD-based and quantile-based measures, we will use the following bound on complementary error function

$$\operatorname{erfc}(x) \leq e^{-x^2} \quad \text{where} \quad \operatorname{erfc}(x) = \frac{2}{\sqrt{\pi}} \int_x^\infty e^{-t^2} dt \quad \text{and} \quad x > 0$$

From this bound and the equation  $H' = 2\mu' \operatorname{erf}(\sigma/\sqrt{2})$  we immediately obtain  $H' \geq 2e^\mu(e^{\sigma^2/2} - 1)$ . On the other hand, since  $Q_1 = -Q_3$  and  $Q_3 < 1$  we have for  $\sigma > \sqrt{2}$ :

$$H'_Q = e^\mu \frac{(e^{\sigma Q_3} - e^{-\sigma Q_3})}{2} < e^\mu \frac{(e^{\sigma Q_3} - 1)}{2} < 2e^\mu(e^\sigma - 1) < 2e^\mu(e^{\sigma^2/2} - 1) \leq H'$$

Since  $H' \leq \sigma'$  we immediately obtain  $H'_Q < H' \leq \sigma'$ .

Next, we consider the skewness. It is easy to show that for large  $\sigma$ , the classical skewness  $S' > 1$ . In fact, if we define  $a = \exp(\sigma^2)$  then we can re-write  $S' = (a+2)\sqrt{a-1}$ . It is clear that  $S'$  increases with  $a$  and is unbounded. Since the MAD skewness  $A'_M \leq 1$  and quantile skewness  $A'_Q \leq 1$ , we can solve for  $S^* = 1$  and (numerically) find  $\sigma \approx 0.133$ . For  $\sigma > 0.133$  we have  $S' > 1$  and, therefore, both  $A'_M < S'$  and  $A'_Q < S'$ .

Next, we consider the quantile-based kurtosis  $T'_Q$ . From equation (2) we have

$$T'_Q = e^{\sigma(O_7 - Q_3)} \left[ \frac{1 - e^{-\sigma(O_7 - O_5)} + e^{-\sigma(O_7 + \sigma O_5)} - e^{-2\sigma O_7}}{1 - e^{-2\sigma Q_3}} \right] > e^{\sigma(O_7 - Q_3)} \quad (3)$$

Since  $(O_7 - Q_3) > 0$  it follows that  $T'_Q > 1$  and  $T'_Q \mapsto \infty$  as  $\sigma \mapsto \infty$ . Therefore, for log-normal distributions, the quantile-based kurtosis  $T'_Q$  is unbounded. By contrast, the MAD-based kurtosis  $T'_M$  is always in the range  $[0, 1]$  and therefore,  $T'_M < T'_Q$ . Similarly, since  $(O_7 - Q_3) < 1$ , from equation (3) we can show

$$T'_Q < 2e^{\sigma(O_7 - Q_3)} < 2e^\sigma$$

On the other hand, for the classical kurtosis  $K'$  we have

$$K' = e^{4\sigma^2}(1 + 2e^{-\sigma^2} + 3e^{-2\sigma^2} - 6e^{-4\sigma^2}) > e^{4\sigma^2} > 2e^\sigma > T'_Q$$

Therefore, for large  $\sigma$ ,  $K' > 2e^\sigma > T'_Q$ .

Let us establish some asymptotic expressions for MAD-based skewness and kurtosis for  $\sigma \mapsto 0$  and for  $\sigma \mapsto \infty$ . We start with  $\sigma \mapsto 0$ . Since the derivative of

the cumulative distribution function  $\Phi(\cdot)$  is the density function  $f(\cdot)$ , we have  $\partial\Phi(y)/\partial y = e^{-y^2/2}/\sqrt{2\pi}$ . Therefore, for  $\sigma \mapsto 0$  we have

$$\frac{\partial\Phi(\sigma - Q_1)}{\partial\sigma} \mapsto \frac{e^{-Q_1^2/2}}{\sqrt{2\pi}}, \quad \frac{\partial\Phi(\sigma - Q_3)}{\partial\sigma} \mapsto \frac{e^{-Q_3^2/2}}{\sqrt{2\pi}}, \quad \frac{\partial\Phi(\sigma)}{\partial\sigma} \mapsto \frac{1}{\sqrt{2\pi}}$$

Noting that  $Q_1 = -Q_3$  and  $\sigma^* \mapsto e^\mu$  and applying the l'Hopital rule to MAD-based measures in equation (1) we find

$$H'/\sigma' \mapsto \sqrt{2/\pi}, \quad A'_M \mapsto 0, \quad T'_M \mapsto -1 + 2e^{-Q_3^2/2} \approx 0.59$$

Applying the l'Hopital rule for the quantile-based measures in equation (2) we find:

$$H'_Q/\sigma' \mapsto Q_3 \approx 0.68, \quad A'_Q \mapsto 0, \quad T'_Q \mapsto (O_7 - O_5)/Q_3 \approx 1.23$$

In other words, for  $\sigma \mapsto 0$ , both MAD-based and quantile-based measures to the corresponding values for normal distribution.

Next, we consider the case  $\sigma \mapsto \infty$ . In this case,  $\Phi(\sigma) \mapsto 1$ . It is easy to show that in this case,

$$H'/\sigma' \mapsto 1, \quad A'_M \mapsto 1, \quad T'_M \mapsto 1$$

For the quantile measures, it easy to show  $H'_Q \mapsto \infty$ . An application of the l'Hopital's rule to  $A'_Q$  in equation (2) shows that  $A'_Q \mapsto 1$ . Finally, it follows from equation (3) that  $T'_Q \mapsto \infty$  and is unbounded. Therefore, for  $\sigma \mapsto \infty$  we have

$$H_Q^* \mapsto 0, \quad A_Q^* \mapsto 1, \quad T_Q^* \mapsto \infty$$

### Appendix 3: Details for Laplace Distribution

We consider the following integral

$$J(z) = \int_z^\infty x f(x) dx = \frac{1}{2b} \int_z^\infty x e^{|-x|/b} dx$$

To evaluate this integral, we first consider the case  $z \geq 0$ . With a change of variable  $u = x/b$ , we obtain

$$\begin{aligned} J(z) &= \frac{1}{2b} \int_z^\infty x e^{-x/b} dx = \frac{b}{2} \int_{z/b}^\infty u e^{-u} du = \frac{b}{2} \int_0^\infty u e^{-u} du - \frac{b}{2} \int_0^{z/b} u e^{-u} du \\ &= \frac{b}{2} \Gamma(2) - \frac{b}{2} \left[ -(u+1)e^{-u} \right] \Big|_0^{z/b} = \frac{(b+z)}{2} e^{-z/b} \end{aligned}$$

where  $\Gamma(\cdot)$  denotes the Gamma function. Note that in particular,  $J(0) = b/2$ .

Next, we consider the case  $z \leq 0$ . Again we consider a change of variable  $u = x/b$  and obtain

$$\begin{aligned} J(z) &= \frac{1}{2b} \int_z^\infty x e^{-|x|/b} dx = \frac{1}{2b} \int_z^0 x e^{x/b} dx + \frac{1}{2b} \int_0^\infty x e^{-x/b} dx \\ &= \frac{b}{2} \int_{z/b}^0 u e^u du + \frac{b}{2} \int_0^\infty x e^{-x/b} dx = \frac{b}{2} [(u-1)e^u] \Big|_{z/b}^0 + \frac{b}{2} \\ &= \frac{(b-z)}{2} e^{z/b} \end{aligned}$$

## Appendix 4: Details for Pareto Distribution

This distribution has infinite mean  $\mu$  for  $\alpha \leq 1$ , undefined variance  $\sigma^2$  for  $\alpha \leq 2$ , undefined skewness  $S$  for  $\alpha \leq 3$  and undefined (excess) kurtosis  $K$  for  $\alpha \leq 4$ . These measures are

$$\begin{aligned} \mu &= \frac{\alpha\beta}{\alpha-1}, \quad \sigma^2 = \frac{\beta^2\alpha}{(\alpha-1)^2(\alpha-2)}, \quad S = \frac{2(1+\alpha)}{\alpha-3} \sqrt{\frac{\alpha-2}{\alpha}}, \\ K &= \frac{6(\alpha^3 + \alpha^2 - 6\alpha - 2)}{\alpha(\alpha-3)(\alpha-4)} \end{aligned}$$

Recall that MAD-based measures for Pareto are

$$\begin{aligned} H &= \frac{\beta\alpha(\sqrt[3]{2}-1)}{\alpha-1}, \quad A_M = -1 + \frac{\sqrt[3]{2}}{\alpha(\sqrt[3]{2}-1)}, \\ T_M &= \frac{3\sqrt[3]{4/3} + \sqrt[3]{4} - 2\sqrt[3]{2} - 2}{2(\sqrt[3]{2}-1)} \end{aligned}$$

whereas quantile-based measures are

$$\begin{aligned} H_Q &= \frac{\beta(\sqrt[3]{4} - \sqrt[3]{4/3})}{2}, \quad A_Q = -1 + \frac{2(\sqrt[3]{4} - \sqrt[3]{2})}{\sqrt[3]{4} - \sqrt[3]{4/3}}, \\ T_Q &= \frac{(\sqrt[3]{8/5} - \sqrt[3]{8/7}) + (\sqrt[3]{8} - \sqrt[3]{8/3})}{\sqrt[3]{4} - \sqrt[3]{4/3}} \end{aligned}$$

We start with comparing deviation measures  $\sigma$ ,  $H$  and  $H_Q$ . Since all these measures are proportional to  $\beta$ , we can take  $\beta = 1$  and obtain:

$$H_Q < \frac{\sqrt[3]{4}-1}{2} = \frac{(\sqrt[3]{2}-1)(\sqrt[3]{2}+1)}{2} = \frac{(\alpha-1)H}{\alpha} \cdot \frac{(\sqrt[3]{2}+1)}{2} < H$$

Since  $H < \sigma$  we have  $H_Q < H < \sigma$ . Next, we consider the skewness. The median is decreasing with  $\alpha$  and for  $\alpha > 1$  we have

$$A_Q < -1 + \frac{2(\sqrt[3]{4} - \sqrt[3]{2})}{\sqrt[3]{4} - \sqrt[3]{4/3}} < 0.5$$

Using the inequality  $e^t \leq 1/(1-t)$  for  $t \in [0,1)$  and substituting  $t = \log 2/\alpha$  we have  $\log 2/\alpha \geq 1 - 1/2^{1/\alpha}$  and obtain

$$A_M = -1 + \frac{\sqrt[3]{2}}{\sqrt[3]{2}-1} \geq -1 + \frac{1}{\log 2} > 1/35$$

Therefore,  $A_Q < A_M$ . Note that for the classical skewness with  $\alpha > 3$

$$S = 2 \left( 1 + \frac{4}{\alpha-3} \right) \sqrt{1 - \frac{2}{\alpha}} > 2 \sqrt{1 - \frac{2}{\alpha}} > \frac{2}{\sqrt{3}} > 1$$

Since  $A_M \leq 1$  we conclude  $A_Q < A_M < S$ . For  $\alpha \mapsto \infty$ , a simple application of the L'Hopital's rule gives  $\sigma \mapsto \beta$  and  $S \mapsto 2$  as  $\alpha \mapsto \infty$ .

Finally, let us consider kurtosis. On the one hand,

$$T_Q < \frac{(\sqrt[3]{2}-1) + (\sqrt[3]{8}-\sqrt[3]{4})}{\sqrt[3]{4}-1} = \frac{(\sqrt[3]{2}+1)^2 - 2\sqrt[3]{2}}{\sqrt[3]{2}+1} < \sqrt[3]{2}+1 < 3$$

On the other hand, since  $O_7 > Q_3$  and  $O_3 > Q_1$  we have

$$T_Q > \frac{\sqrt[3]{4} + \sqrt[3]{4/3}}{\sqrt[3]{4} - \sqrt[3]{4/3}} = 1 + \frac{2\sqrt[3]{4/3}}{\sqrt[3]{4} - \sqrt[3]{4/3}} > 1 + \frac{2\sqrt[3]{4/3}}{\sqrt[3]{4}} = 1 + \frac{2}{\sqrt[3]{3}} > 1$$

Since MAD-based kurtosis  $0 < T_M < 1$  we immediately obtain  $T_M < T_Q$ . On the other hand, for classical kurtosis with  $\alpha > 4$ , we have

$$K = 6 \left( 1 + \frac{8(\alpha-2)^2 + 12(\alpha-3) + 6}{\alpha(\alpha-3)(\alpha-4)} \right) > 6$$

Therefore  $T_M < T_Q < K$ . By the L'Hopital's rule, it is easy to show that  $K \mapsto 6$  as  $\alpha \mapsto \infty$ .

Let us examine the asymptotic behavior of quantile-based and MAD-based measures for  $\alpha \mapsto 1$  and  $\alpha \mapsto \infty$ . As before, assume  $\beta = 1$ . We start with  $\alpha \mapsto 1$ . From equations () and () we immediately obtain the following asymptotic expressions for Pareto distribution as  $\alpha \mapsto 1$ :

$$\begin{cases} H \mapsto \infty \\ A_M \mapsto 1 \\ T_M \mapsto 1 \end{cases} \quad \text{and} \quad \begin{cases} H_Q \mapsto 4/3 \\ A_Q \mapsto 0.5 \\ T_Q \mapsto \frac{(8/5 - 8/7) + (8 - 8/3)}{(4 - 4/3)} \approx 2.17 \end{cases}$$

Next, we consider the limiting case when  $\alpha \mapsto \infty$ . Since for  $\alpha > 1$  we have  $0 < \log 2/\alpha < 1$ . Let us consider the following inequality  $1 + t < e^t < 1/(1-t)$  for  $t < 1$ . Substituting  $t = (\log 2)/\alpha$  we have

$$\log 2 < \alpha(\sqrt[3]{2}-1) < \frac{\log 2}{1 - (\log 2)/\alpha}$$

Therefore, for large  $\alpha$  we have  $\alpha(\sqrt[3]{2} - 1) \mapsto \log 2$ . A simple application of the l'Hopital rule gives us  $H/\sigma \mapsto \log 2$ . Substituting results from the previous equation to expressions in equations ( ) and ( ) we obtain the following asymptotic expressions for Pareto distribution as  $\alpha \mapsto \infty$

$$\left\{ \begin{array}{l} H \mapsto \frac{\log 2}{\alpha - 1} \mapsto 0 \\ A_M \mapsto -1 + \frac{1}{\log 2} \approx 0.44 \\ T_M \mapsto 3 - \frac{3 \log 3}{2 \log 2} \approx 0.62 \end{array} \right. \quad \text{and} \quad \left\{ \begin{array}{l} H_Q \mapsto \frac{\log 3}{2(\alpha - 1)} \mapsto 0 \\ A_Q \mapsto -1 + \frac{2 \log 2}{\log 3} \approx 0.26 \\ T_Q \mapsto 1 + \frac{\log(7/5)}{\log 3} \approx 1.31 \end{array} \right.$$
